# Supplementary material for: Hypothalamic CDK4 regulates thermogenesis by modulating sympathetic innervation of adipose tissues
Source: PubMed Central journal article supplement (PMC7507572; doi:10.15252/embr.201949807), 2020-07-12
Supplement: EMBR-21-e49807-s001.pdf [file EMBR-21-e49807-s001.pdf]

**Appendix:** Hypothalamic CDK4 regulates thermogenesis by modulating  
sympathetic innervation and activation of BAT

**Table of contents**

|                                  |   |
|----------------------------------|---|
| 1. Appendix Figure S1            | 2 |
| 2. Appendix Figure S2            | 3 |
| 3. Appendix Figure S3            | 4 |
| 4. Appendix Figure S4            | 6 |
| 5. Appendix supplemental methods | 7 |

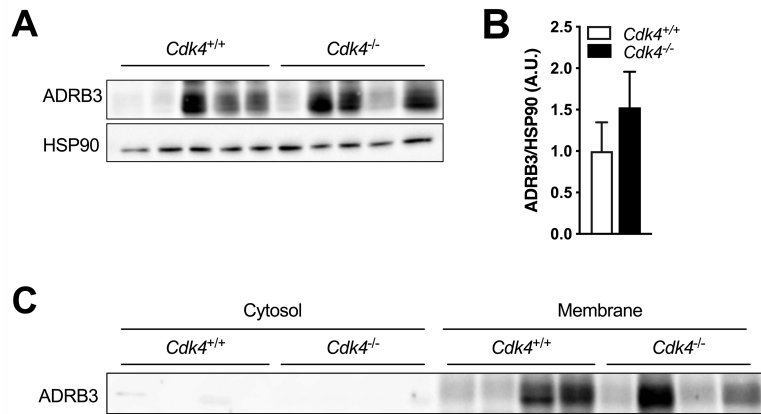

**Appendix Figure S1 - Expression of beta-3 adrenergic receptor (ADRB3) in scWAT of *Cdk4*<sup>-/-</sup> mice.**

A-B Western blot analysis (A) and quantification of ADRB3 protein expression (n=5 biological replicates) (B) in scWAT of *Cdk4*<sup>+/+</sup> and *Cdk4*<sup>-/-</sup> mice. HSP90 was used as loading control.

C Western blot analysis of the location of ADRB3 with tissue subcellular fractions (cytoplasm and plasma membrane) of scWAT of *Cdk4*<sup>+/+</sup> and *Cdk4*<sup>-/-</sup> mice (n=4 biological replicates).

Data information: All data are shown as the mean  $\pm$  SEM.

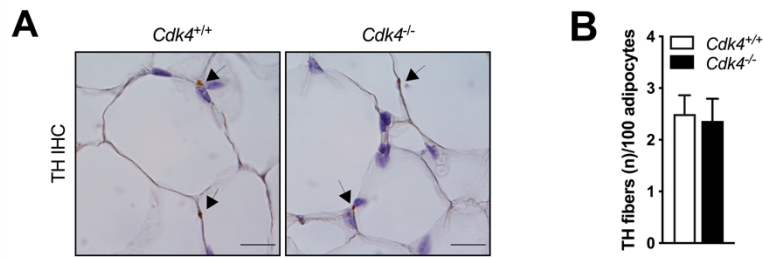

**Appendix Figure S2 - TH immunohistochemical analysis in scWAT of *Cdk4*<sup>-/-</sup> mice.**

A-B TH immunohistochemical staining in scWAT sections (scale bar 10  $\mu$ m, arrows indicate TH parenchymal fibers) (A) and corresponding quantification of the number of TH fibers relative to 100 adipocytes (B) (*Cdk4*<sup>+/+</sup> (n=6) and *Cdk4*<sup>-/-</sup> (n=5)).

Data information: All data are shown as the mean  $\pm$  SEM; Student's t-test was used for statistical analysis. \*\*P<0.01.

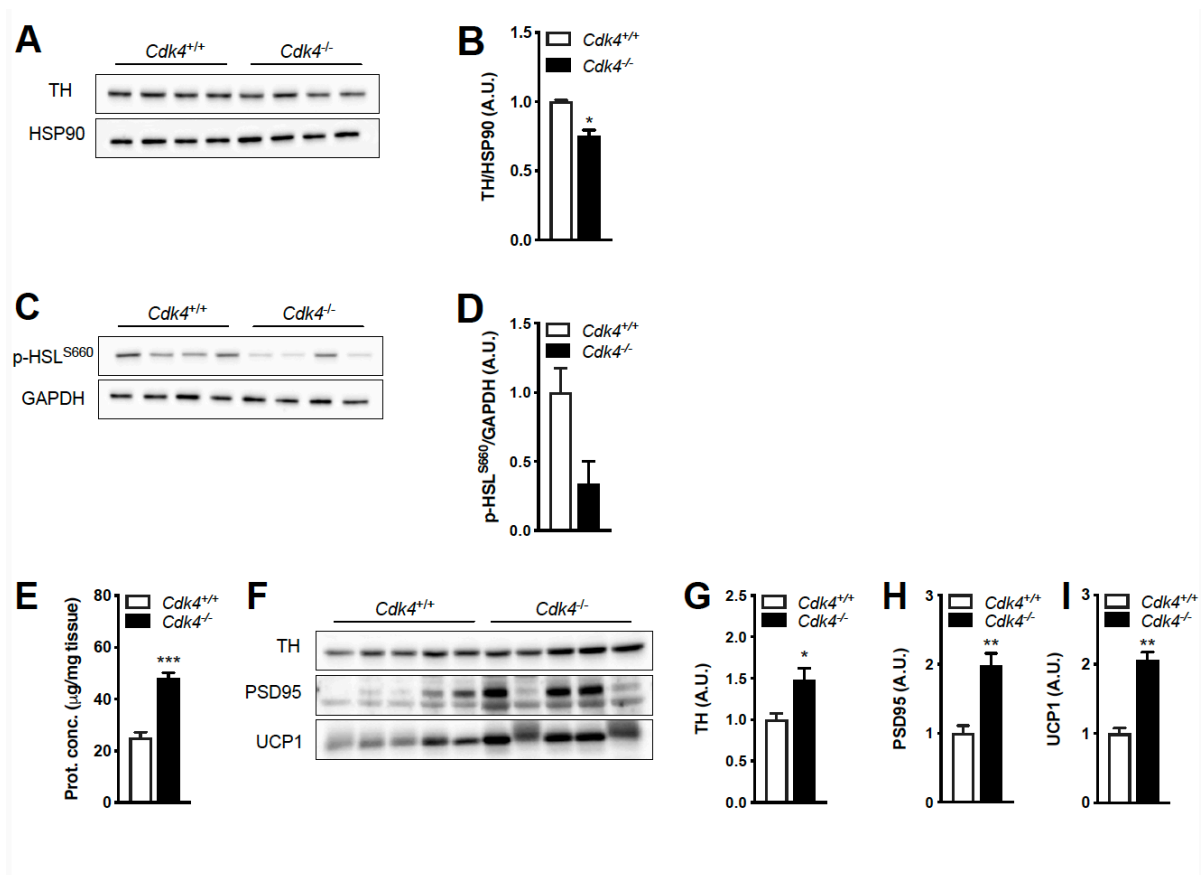

**Appendix Figure S3 - Expression of TH and p-HSL S660 in iBAT of *Cdk4*<sup>-/-</sup> mice.**

A-B Western blot analysis (A) and quantification of TH (B) in iBAT of *Cdk4*<sup>+/+</sup> and *Cdk4*<sup>-/-</sup> mice (n=4 biological replicates). HSP90 was used as loading control.

C-D Western blot analysis (C) and quantification of p-HSL S660 protein expression (D) (n=4 biological replicates) in iBAT of *Cdk4*<sup>+/+</sup> and *Cdk4*<sup>-/-</sup> mice. GAPDH was used as loading control.

E Protein concentration of iBAT protein extracts from equal amounts of tissues in *Cdk4*<sup>+/+</sup> (n=5) and *Cdk4*<sup>-/-</sup> (n=5) mice.

F-G Western blot analysis (F) and quantification of TH (G) and PSD95 (H) and UCP1 (I) in iBAT protein extracts of equal amount for *Cdk4*<sup>+/+</sup> and *Cdk4*<sup>-/-</sup> mice (n=5 biological replicates).

Data information: All data are shown as the mean  $\pm$  SEM; Student's t-test (D) and Mann-Whitney U test (B, F, G) were used for statistical analyses. \*\*P<0.01, \*\*\*P<0.001, \*\*\*P<0.005.

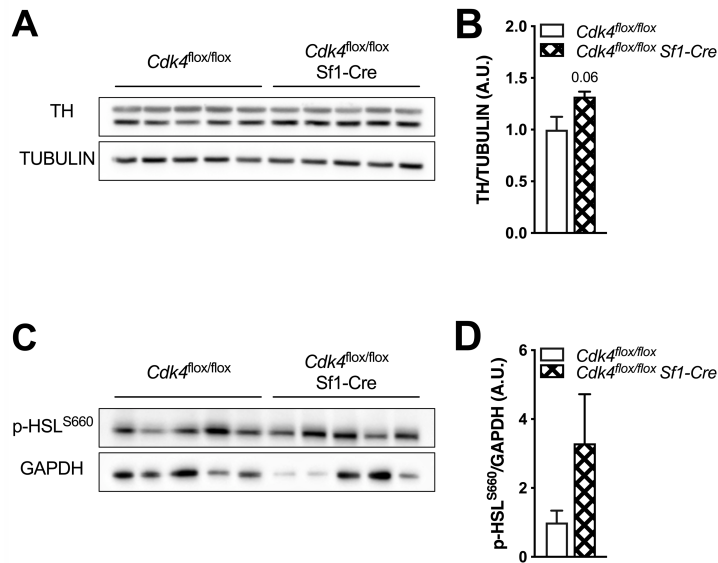

**Appendix Figure S4 - Expression of TH and p-HSL S660 in BAT of *Cdk4<sup>flox/flox</sup> Sf1-Cre* mice.**

A-B Western blot analysis (A) and quantification of TH (B) (n=5 biological replicates) in iBAT of *Cdk4<sup>flox/flox</sup>* and *Cdk4<sup>flox/flox</sup> Sf1-Cre* mice. Tubulin was used as loading control.

C. Western blot analysis (C) and quantification (D) of p-HSL S660 protein expression (n=5 biological replicates) in iBAT of *Cdk4<sup>flox/flox</sup>* and *Cdk4<sup>flox/flox</sup> Sf1-Cre* mice. GAPDH was used as loading control.

Data information: All data are shown as the mean  $\pm$  SEM; Mann-Whitney U test was used for statistical analysis.

## Appendix supplemental methods

**Subcellular fractionation of scWAT.** Sample preparation was performed as previously described (Xia, Pessentheiner et al., 2018). 100mg of frozen tissue (scWAT from *Cdk4*<sup>+/+</sup> and *Cdk4*<sup>-/-</sup> mice) were minced in 1 mL hypotonic lysis buffer containing 50 mM HEPES, 50 mM sucrose, 1 mM EDTA, 100 mM NaCl and 1 x PIC, and were thoroughly dounced (60 strokes) with a tissue Grinder (VWR VOS14) at 1600 rpm. Lysates were centrifuged at 5000 g, 4 °C for 10 minutes to pellet organelles and cell debris. The supernatant was centrifuged at 100,000 g, 4 °C for 1 hour. The resulting membrane pellets were resuspended in RIPA buffer with 1 x PIC for Western blotting. The supernatant represented the cytosolic fraction. Cytosolic proteins were precipitated with four times the sample volume of cold (-20°C) acetone. After overnight precipitation, samples were centrifuge at 13,000× g for 10 minutes. The resulting pellet was resuspended in RIPA buffer with 1x PIC. 20µg of protein were loaded for Western blotting.

**Protein extraction and western blot analysis.** Proteins from BAT and scWAT were extracted using mammalian protein extraction reagent (MPER, Pierce) as per the manufacturer's instructions, separated by gel electrophoresis and analyzed using the antibodies anti-ADRB3 (ab94506, Abcam. Kindly provided by Dr. Hadrien Demagny and Prof. Kristina Schoonjans), anti-PSD95 (ab18258, Abcam) and anti-p-HSL<sup>S660</sup> (4126, Cell signaling).

## References

Xia W, Pessentheiner AR, Hofer DC, Amor M, Schreiber R, Schoiswohl G, Eichmann TO, Walenta E, Itariu B, Prager G, Hackl H, Stulnig T, Kratky D, Rulicke T, Bogner-Strauss JG (2018) Loss of ABHD15 Impairs the Anti-lipolytic Action of Insulin by Altering PDE3B Stability and Contributes to Insulin Resistance. *Cell Rep* 23: 1948-1961
