# Supplementary material for: Hypothalamic CDK4 regulates thermogenesis by modulating sympathetic innervation of adipose tissues
Source: PubMed Central journal article supplement (PMC7507572; doi:10.15252/embr.201949807), 2020-07-12
Supplement: EMBR-21-e49807-s002.pdf [file EMBR-21-e49807-s002.pdf]

## Expanded View Figures

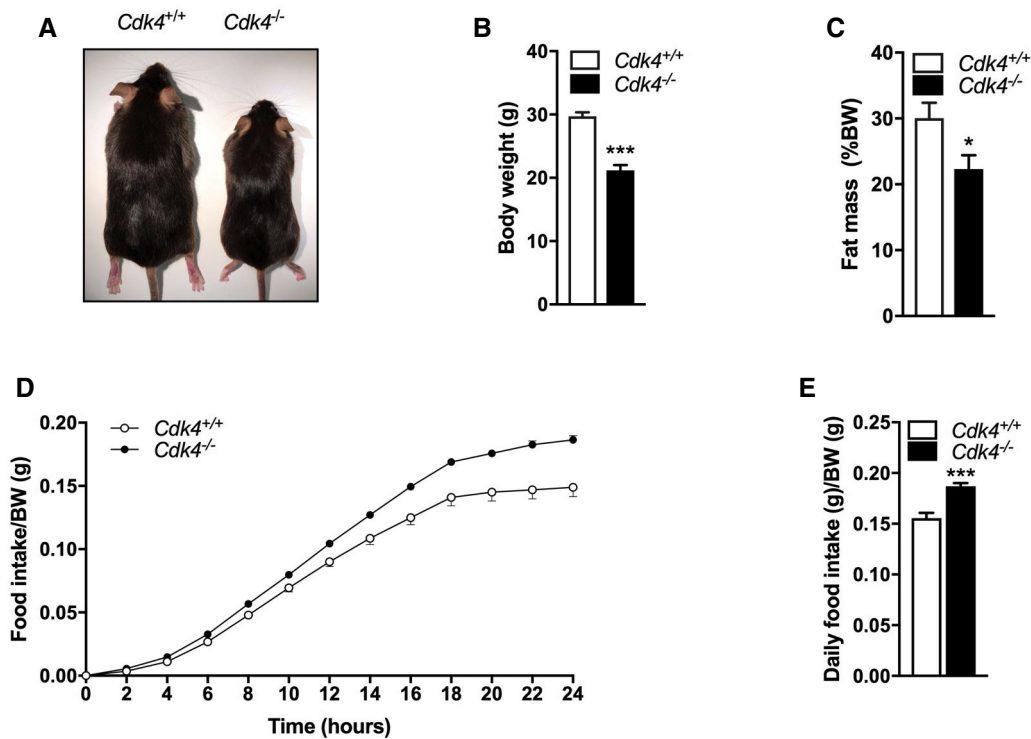

**Figure EV1.** *Cdk4*<sup>-/-</sup> mice are smaller and have increased food intake compared to their wild-type littermates (*Cdk4*<sup>+/+</sup>).

A Whole-body image of *Cdk4*<sup>+/+</sup> and *Cdk4*<sup>-/-</sup> mice.

B, C Body weight (B) and fat mass percentage (C) of *Cdk4*<sup>+/+</sup> (*n* = 5) and *Cdk4*<sup>-/-</sup> (*n* = 6) mice.

D, E Food intake was measured using the Phenomaster device (TSE system) and is shown as cumulative intake over 24 h (D) and daily cumulative food intake (E) of 14-week-old *Cdk4*<sup>+/+</sup> (*n* = 7) and *Cdk4*<sup>-/-</sup> (*n* = 8) mice.

Data information: All data are shown as the mean ± SEM. Student's *t*-test was used for statistical analysis \**P* < 0.05; \*\*\**P* < 0.001.

Source data are available online for this figure.

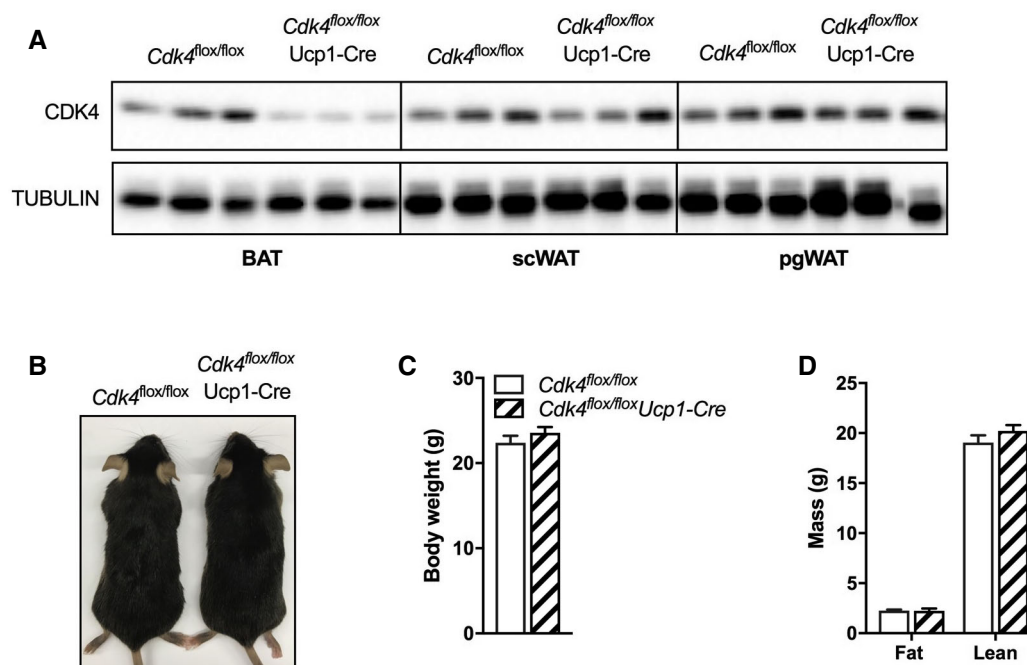

**Figure EV2. *Cdk4* BAT-specific knockout mice have normal body weight, fat mass, and lean mass.**

A Western blot for CDK4 expression in iBAT, scWAT, and pgWAT from *Cdk4<sup>flox/flox</sup>* ( $n = 3$  biological replicates) and *Cdk4<sup>flox/flox</sup> Ucp1-Cre* ( $n = 3$ ) mice. Tubulin was used as loading control. Please notice that upon amplification, the western blot images are abnormally pixelated. This is because the saturation of the images is shown in FigEV2A\_Exposure\_3.0sec.scn, which is a direct acquisition file from the Imager, and is found in the data source folder. A JPEG image is also available in this folder.

B Whole-body image of *Cdk4<sup>flox/flox</sup>* and *Cdk4<sup>flox/flox</sup> Ucp1-Cre* mice.

C, D Body weight (C) and body composition (fat and lean mass) (D) of *Cdk4<sup>flox/flox</sup>* ( $n = 8$ ) and *Cdk4<sup>flox/flox</sup> Ucp1-Cre* ( $n = 8$ ) mice.

Data information: All data are shown as the mean  $\pm$  SEM.

Source data are available online for this figure.

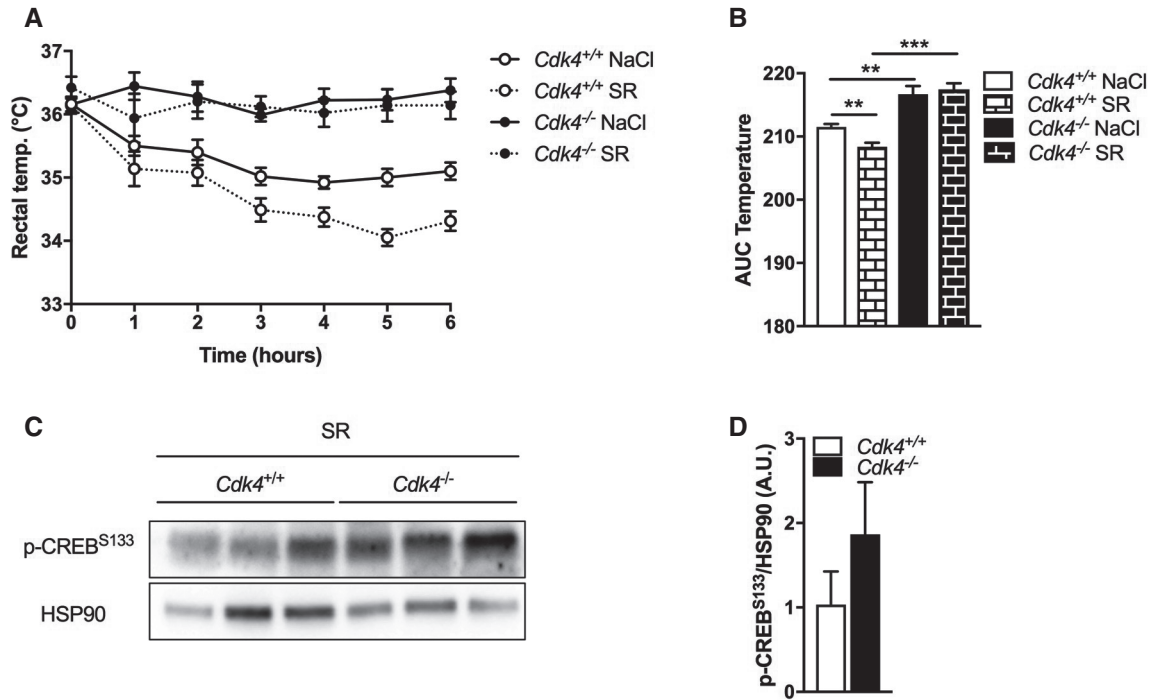

**Figure EV3.  $\beta$ 3-receptor inhibition does not blunt the increased thermogenic response of *Cdk4*<sup>-/-</sup> animals.**

A, B Acute cold test (4°C) after 5 days of treatment with a  $\beta$ 3-adrenergic antagonist (SR; *Cdk4*<sup>+/+</sup> [*n* = 5] and *Cdk4*<sup>-/-</sup> [*n* = 5]) or vehicle (NaCl; *Cdk4*<sup>+/+</sup> [*n* = 8] and *Cdk4*<sup>-/-</sup> [*n* = 9]) (A) and corresponding quantification of the area under the curve (AUC) (B).

C, D Western blot analysis (C) and quantification of p-CREB S133 protein expression after 7 days of SR treatment (D) (*n* = 3 biological replicates). HSP90 was used as loading control.

Data information: All data are shown as the mean  $\pm$  SEM. Student's *t*-test was used for statistical analyses. \*\**P* < 0.01, \*\*\**P* < 0.001.

Source data are available online for this figure.

**Figure EV4. *Cdk4* deficiency in Sf1 neurons does not affect body weight, body composition, or indirect calorimetry measures.**

A, B Body weight (A) and body composition (fat mass and lean mass) (B) of *Cdk4*<sup>fllox/fllox</sup> (*n* = 17) and *Cdk4*<sup>fllox/fllox</sup> Sf1-Cre (*n* = 11) mice.

C–H Indirect calorimetry was performed using the Oxymax apparatus (Columbus Instruments) in *Cdk4*<sup>fllox/fllox</sup> (*n* = 6) and *Cdk4*<sup>fllox/fllox</sup> Sf1-Cre (*n* = 5) mice. Whole-body oxygen consumption rate (VO<sub>2</sub>) (C, D), respiratory exchange ratio (RER) (E, F), and energy expenditure (G, H) were measured at 24°C during the light phase (white rectangle) and dark phase (black rectangle).

I, J CalR was used to implement GLM-regression plot for each group corresponding to the association between energy balance and total body mass at 24°C (I). The CalR interface displays each mouse as a dot, and the standard error of mean for each group in gray. The “mass effect” and “group effect” were analyzed using a generalized linear model (GLM) using body weight as a covariate. The results of this analysis are shown in table (J) for *Cdk4*<sup>fllox/fllox</sup> (*n* = 6) and *Cdk4*<sup>fllox/fllox</sup> Sf1-Cre (*n* = 5) mice.

Data information: All data are shown as the mean  $\pm$  SEM.

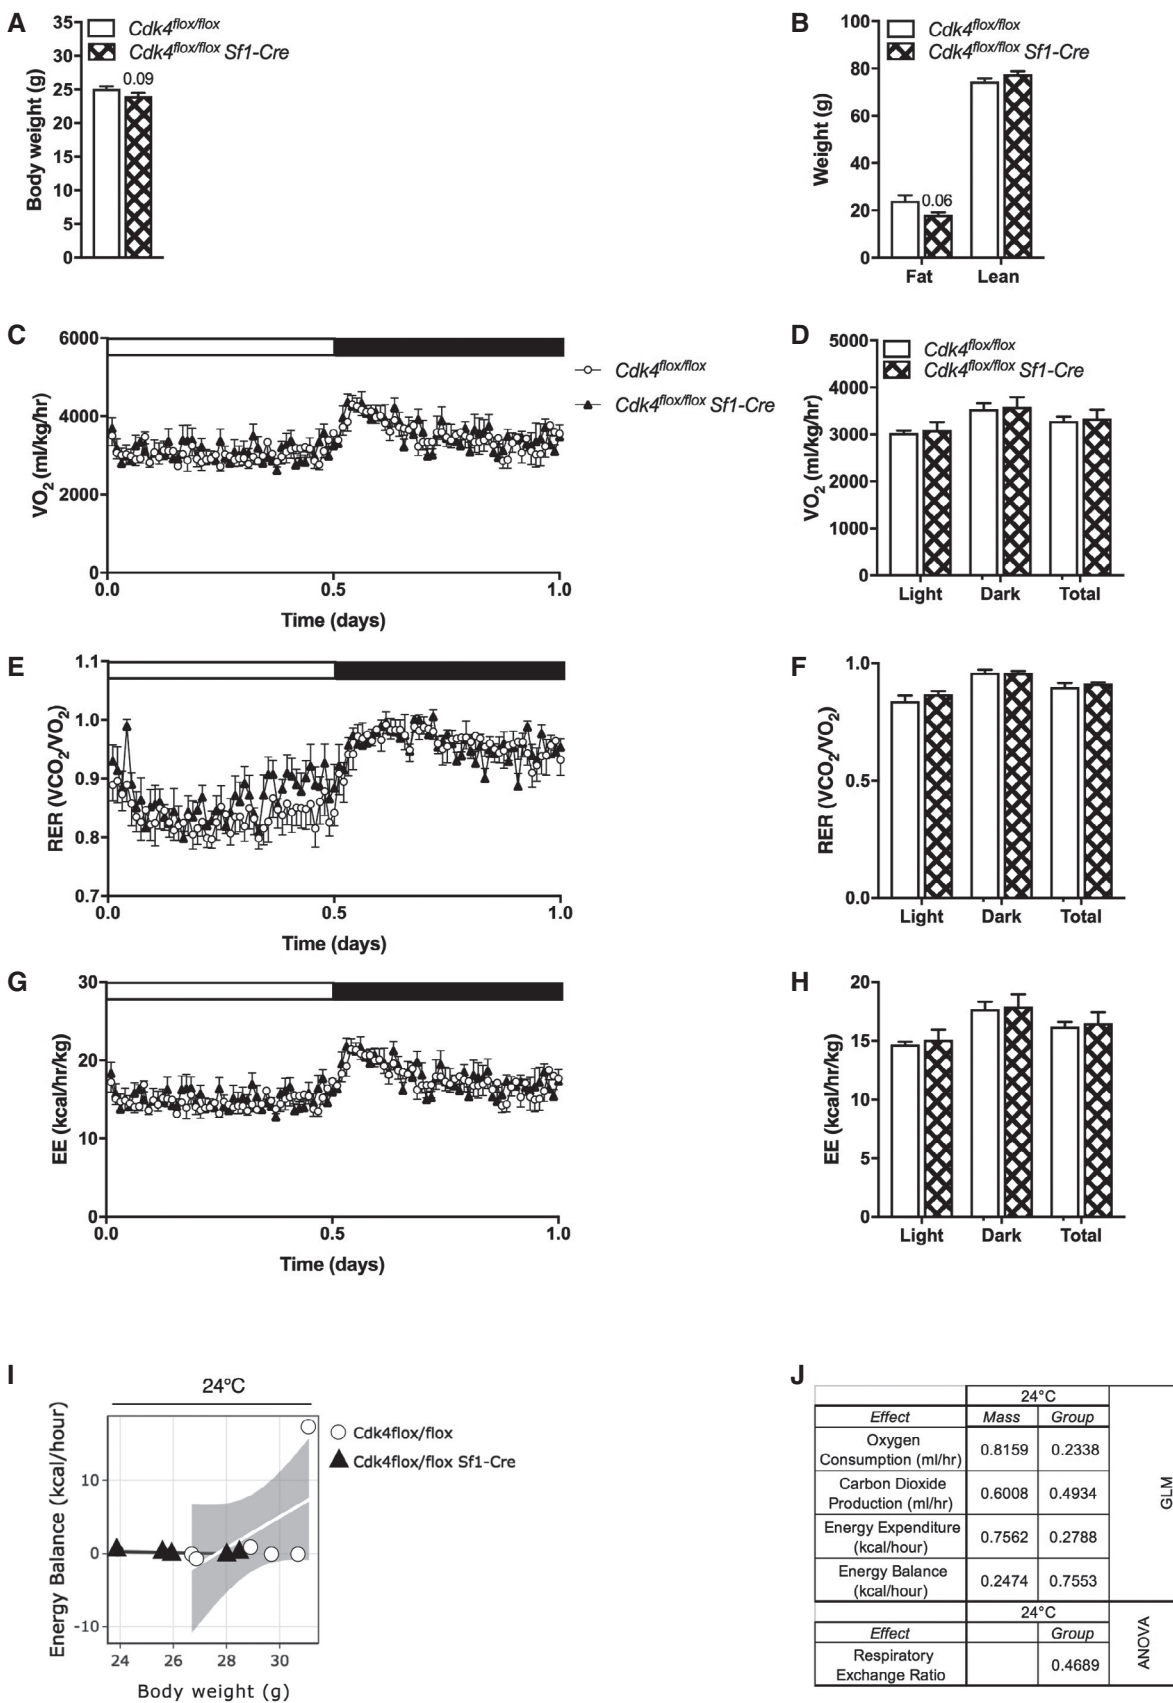

Figure EV4.

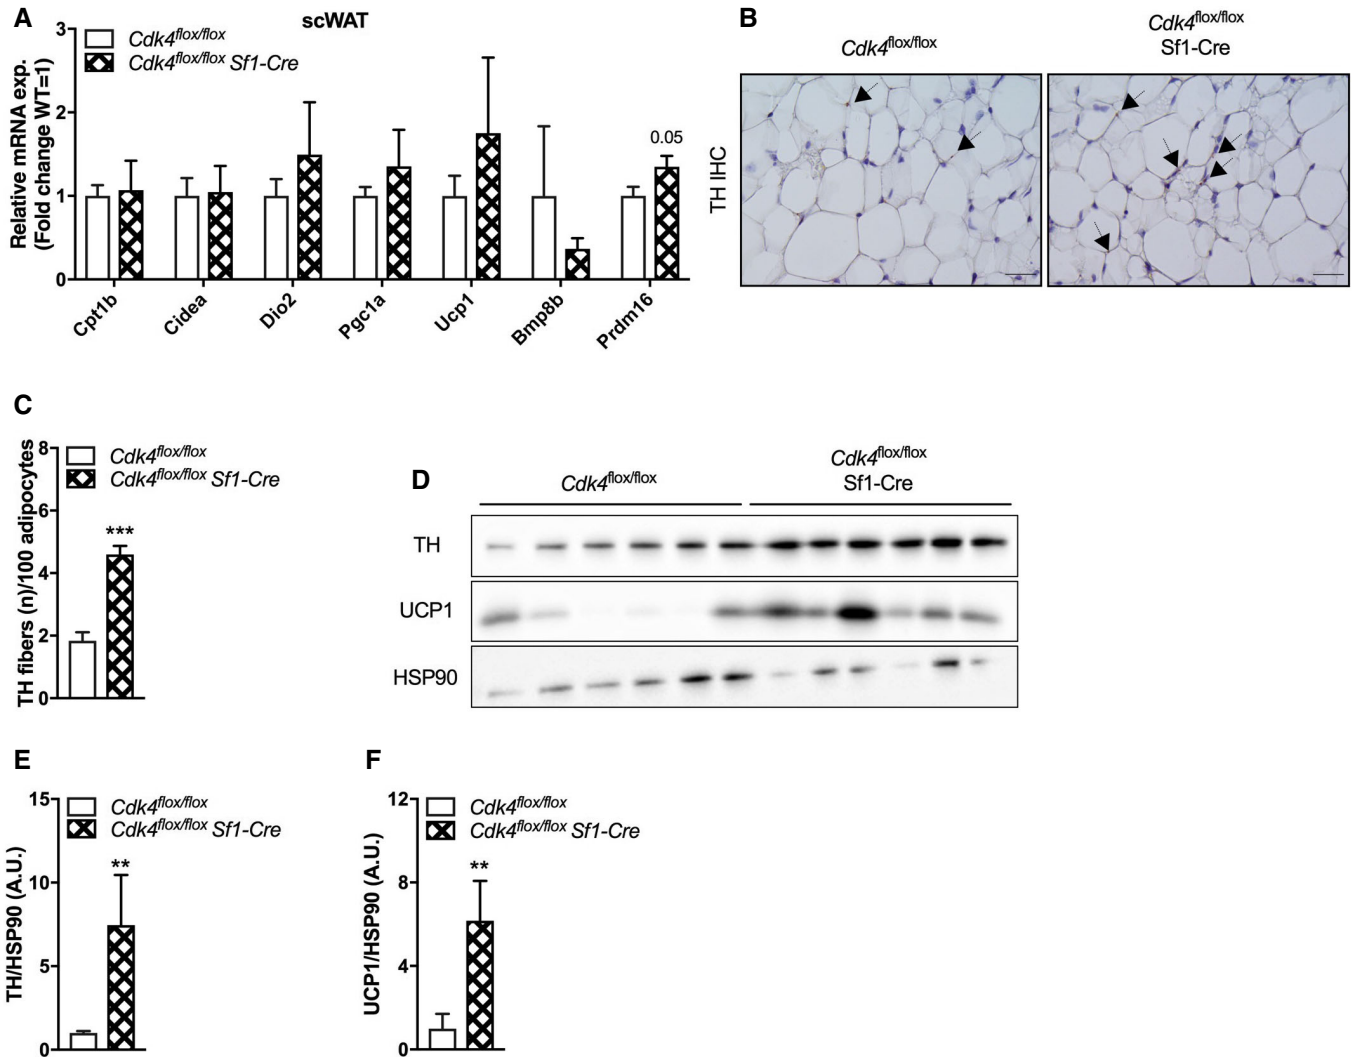

**Figure EV5. Increased sympathetic innervation and WAT browning in  $Cdk4^{flox/flox}$  Sf1-Cre mice.**

A Expression of thermogenic genes in scWAT of  $Cdk4^{flox/flox}$  ( $n = 9$ ) and  $Cdk4^{flox/flox}$  Sf1-Cre ( $n = 8$ ) mice as assessed by RT-PCR.

B, C TH immunohistochemical (IHC) staining in iBAT sections (scale bar 20  $\mu$ m, arrows indicate TH parenchymal fibers) (B) and corresponding quantification of the number of TH fibers relative to 100 adipocytes (C) ( $Cdk4^{flox/flox}$  [ $n = 5$ ] and  $Cdk4^{flox/flox}$  Sf1-Cre [ $n = 6$ ]).

D–F Western blot analysis (D) and quantification of TH (E) and UCP1 protein expression ( $n = 6$  biological replicates) (F). HSP90 was used as loading control.

Data information: All data are shown as the mean  $\pm$  SEM. Student's  $t$ -test (C) and Mann–Whitney  $U$ -test (E, F) were used for statistical analyses. \*\* $P < 0.01$ , \*\*\* $P < 0.001$ .

Source data are available online for this figure.
